# Supplementary material for: Efficient and stable Sr3Eu2B4O12 red phosphor benefiting from low symmetry and distorted local environment
Source: Royal Society of Chemistry journal article supplement (doi:10.1039/c9dt04769g), 2020-01-01
Supplement: c9dt04769g2.pdf [file c9dt04769g2.pdf]

**Table S1. Details of Final Rietveld Refinement Result of Sr<sub>3</sub>Eu<sub>2</sub>B<sub>4</sub>O<sub>12</sub>.**

|                           |                                                                |
|---------------------------|----------------------------------------------------------------|
| Formula                   | Sr <sub>3</sub> Eu <sub>2</sub> B <sub>4</sub> O <sub>12</sub> |
| Radiation type            | Cu K $\alpha$                                                  |
| 2 $\theta$ range (°)      | 10.00-130.0                                                    |
| Step (°)                  | 0.017                                                          |
| Scan time per step (s)    | 2                                                              |
| Refinement                | Rietveld method                                                |
| No. of refined parameters | 68                                                             |
| $R_B$                     | 6.76%                                                          |
| $R_P$                     | 2.36%                                                          |
| $R_{WP}$                  | 3.27%                                                          |
| $S$                       | 2.40                                                           |
| Symmetry                  | orthorhombic                                                   |
| Space group               | <i>Pnma</i> (No.62)                                            |
| $a$ (Å)                   | 7.2991(2)                                                      |
| $b$ (Å)                   | 15.8333(3)                                                     |
| $c$ (Å)                   | 8.6450(2)                                                      |
| Volume (Å <sup>3</sup> )  | 999.10(4)                                                      |
| $Z$                       | 4                                                              |

**Table S2. Crystallographic Parameters for the Final Refinement Results of As-prepared Sr<sub>3</sub>Eu<sub>2</sub>B<sub>4</sub>O<sub>12</sub> Phosphor.**

| Atom | Ox. | Wyck. | Site | S.O.F. | x/a        | y/b        | z/c        | U [Å <sup>2</sup> ] |
|------|-----|-------|------|--------|------------|------------|------------|---------------------|
| O1   |     | 8d    | 1    | 1      | 0.448(2)   | 0.3234(7)  | 0.0740(18) | 0.0063              |
| Sr1  |     | 4c    | .m.  | 0.365  | 0.1798(6)  | 0.25       | 0.9670(4)  | 0.006(2)            |
| Eu2  |     | 8d    | 1    | 0.343  | -0.1947(4) | 0.37329(2) | 0.1571(4)  | 0.0094(2)           |
| Sr2  |     | 8d    | 1    | 0.658  | -0.1947(4) | 0.37329(2) | 0.1571(4)  | 0.0094(2)           |
| Eu3  |     | 8d    | 1    | 0.34   | -0.0209(4) | 0.41868(2) | 0.6788(4)  | 0.0054(2)           |
| Sr3  |     | 8d    | 1    | 0.66   | -0.0209(4) | 0.41868(2) | 0.6788(4)  | 0.0054(2)           |
| Eu1  |     | 4c    | .m.  | 0.635  | 0.1798(6)  | 0.25       | 0.9670(4)  | 0.006(2)            |
| O2   |     | 4c    | .m.  | 1      | 0.125(2)   | 0.25       | 0.2475(2)  | 0.0063              |
| O3   |     | 8d    | 1    | 1      | -0.311(2)  | 0.3144(7)  | 0.7879(2)  | 0.0063              |
| O4   |     | 4c    | .m.  | 1      | 0.381(3)   | 0.25       | 0.5196(2)  | 0.0063              |
| O5   |     | 8d    | 1    | 1      | 0.108(2)   | 0.4046(9)  | 0.9322(2)  | 0.0063              |
| O6   |     | 8d    | 1    | 1      | -0.403(2)  | 0.4469(1)  | 0.3210(1)  | 0.0063              |
| O7   |     | 8d    | 1    | 1      | 0.2030(2)  | 0.4866(8)  | 0.5099(2)  | 0.0063              |
| B1   |     | 4c    | .m.  | 1      | 0.50700    | 0.25       | 0.13400    | 0.0063              |
| B2   |     | 4c    | .m.  | 1      | 0.26800    | 0.25       | 0.63900    | 0.0063              |
| B3   |     | 8d    | 1    | 1      | 0.16600    | 0.45760    | 0.04070    | 0.0063              |
